# Supplementary material for: Role of Bioaerosols on the Short-Distance Transmission of Multidrug-Resistant Methicillin-Resistant Staphylococcus aureus (MRSA) in a Chicken Farm Environment
Source: MDPI journal article supplement (doi:10.3390/antibiotics11010081), 2022-01-10
Supplement: s1 [file s1]

## Article

# Role of Bioaerosols on the Short-Distance Transmission of Multidrug-Resistant Methicillin-Resistant *Staphylococcus aureus* (MRSA) in a Chicken Farm Environment

Bing-Mu Hsu <sup>1,†</sup>, Jung-Sheng Chen <sup>2</sup>, Gwo-Jong Hsu <sup>3,†</sup>, Suprokash Koner <sup>1,4,†</sup>, Viji Nagarajan <sup>1</sup> and Hsin-Chi Tsai <sup>5,6,\*</sup>

<sup>1</sup> Department of Earth and Environmental Sciences, National Chung Cheng University, Chiayi County 621, Taiwan; bmhsu@eq.ccu.edu.tw (B.-M.H.); suprokashkoner22@gmail.com (S.K.); mathumitha08@gmail.com (V.N.)

<sup>2</sup> Department of Medical Research, E-Da Hospital, Kaohsiung City 824, Taiwan; nicky071214@gmail.com

<sup>3</sup> Division of Infectious Diseases, Ditmanson Medical Foundation, Chia-Yi Christian Hospital, Chiayi City 600, Taiwan; cych01347@gmail.com

<sup>4</sup> Department of Biomedical Sciences, National Chung Cheng University, Chiayi County 621, Taiwan

<sup>5</sup> Department of Psychiatry, School of Medicine, Tzu Chi University, Hualien County 970, Taiwan

<sup>6</sup> Department of Psychiatry, Tzu-Chi General Hospital, Hualien County 970, Taiwan

\* Correspondence: cssbmw45@gmail.com; Tel.: +886-38561825

† These authors contributed equally to this work.

## Supplementary Materials

**Table S1.** The details of bioaerosol sampling of chicken farm environment.

| Sampling point               | Global positioning system (GPS) | Samples type | Air sampling duration | Air flow speed | Total Volume of air sampling |
|------------------------------|---------------------------------|--------------|-----------------------|----------------|------------------------------|
| 1 <sup>st</sup> chicken shed | 23°58'73.80" N, 120°49'09.34" E | Bioaerosol   | 10 min                | 28.3 (L/min)   | 283 Litter                   |
| 2 <sup>nd</sup> chicken shed | 23°58'78.32" N, 120°49'07.84" E | Bioaerosol   | 10 min                | 28.3 (L/min)   | 283 Litter                   |
| Exposure square              | 23°58'75.76" N, 120°49'07.95" E | Bioaerosol   | 10 min                | 28.3 (L/min)   | 283 Litter                   |
| 3m Downwind                  | 23°58'76.18" N, 120°49'08.88" E | Bioaerosol   | 10 min                | 28.3 (L/min)   | 283 Litter                   |
| 5m Downwind                  | 23°58'76.31" N, 120°49'10.00" E | Bioaerosol   | 10 min                | 28.3 (L/min)   | 283 Litter                   |
| 20m Downwind                 | 23°58'63.17" N, 120°49'11.04" E | Bioaerosol   | 10 min                | 28.3 (L/min)   | 283 Litter                   |
| 50m Downwind                 | 23°58'58.66" N, 120°49'16.07" E | Bioaerosol   | 10 min                | 28.3 (L/min)   | 283 Litter                   |
| 50m Upwind                   | 23°58'78.25" N, 120°48'93.12" E | Bioaerosol   | 10 min                | 28.3 (L/min)   | 283 Litter                   |

**Table S2.** MRSA strain identification, *Spa* typing, *SCCmec* typing, and virulence factors detecting genes primers list and PCR conditions.

| Target gene | Size | Sequence (5' to 3')                 | Reaction Materials<br>Final Volume:<br>25 µl | PCR Condition                | Reference |
|-------------|------|-------------------------------------|----------------------------------------------|------------------------------|-----------|
| nuc         | 270  | nuc-F 5'-GCGATTGATGGTGATACGGTT-3'   | DNA: 100-300 ng                              | Pre-denaturation: 95°C 5 min | [1,2]     |
| mecA        | 448  | nuc-R 5'-AGCCAAGCCTTGACGAATAAAGC-3' | Primer: 400 nM                               | Denaturation: 94°C 60s       |           |
|             |      | mecA-F 5'-CTCAGGTACTGCTATCCACC-3'   | nuc FR & mecA FR                             | Annealing: 55°C 60s          |           |
|             |      | mecA-R 5'-CACTTGGTATATCTTCACC-3'    | Master mix: 5 µl                             | Extension: 72°C 60s          |           |
|             |      |                                     |                                              | D.A.E. Cycles: 30 cycles     |           |
|             |      |                                     |                                              | Final extension: 72°C 10 min |           |

|                |            |                                                                                                                                                                                                                                        |                                                                               |                                                                                                                                                                                                                                                                                              |                              |
|----------------|------------|----------------------------------------------------------------------------------------------------------------------------------------------------------------------------------------------------------------------------------------|-------------------------------------------------------------------------------|----------------------------------------------------------------------------------------------------------------------------------------------------------------------------------------------------------------------------------------------------------------------------------------------|------------------------------|
| Spa            | 270        | Spa-1113F: 5'- TAAAGACGATCCTTCGGTGAGC-3'<br>Spa-1514R: 5'- CAGCAGTAGTGCCGTTTGCTT-3'                                                                                                                                                    | DNA: 100-300 ng                                                               | Pre-denaturation: 80°C 5 min                                                                                                                                                                                                                                                                 | https://spa-server.ridom.de/ |
|                |            |                                                                                                                                                                                                                                        | Primer: 200 nM Spa FR                                                         | Denaturation: 94°C 45s<br>Annealing: 60°C 45s<br>Extension: 72°C 90s                                                                                                                                                                                                                         |                              |
|                |            |                                                                                                                                                                                                                                        | Master mix: 5 µl                                                              | D.A.E. Cycles: 35 cycles<br>Final extension: 72°C 10 min                                                                                                                                                                                                                                     |                              |
| SCCmec I       | 495        | CIF2 F2: 5'-TTCGAGTTGCTGATGAAGAAGG-3'<br>CIF2 R2: 5'-ATTTACCACAAGGACTACCAGC-3'<br>KDP F1: 5'-AATCATCTGCCATTGGTGATGC-3'<br>KDP R1: 5'-CGAATGAAGTGAAAGAAAGTGG-3'                                                                         | DNA: 100-300 ng<br>Primer: 400 nM CIF-FR,<br>200 nM KDP-FR,<br>200 nM RIFF3R9 | Pre-denaturation: 94°C 4 min<br>Denaturation: 94°C 30s<br>Annealing: 53°C 30s<br>Extension: 72°C 1 min                                                                                                                                                                                       | [3]                          |
| SCCmec II, III | 284<br>209 | MECI P2: 5'-ATCAAGACTTGCATTGAGGC-3'<br>MECI P3: 5'-GCGGTTTCAATTCATTGTC-3'                                                                                                                                                              | 400 nM MECI-FR,<br>400 nM RIFF10R13,<br>800 nM DCS-FR                         | D.A.E. Cycles: 30 cycles<br>Final extension: 72°C 4 min                                                                                                                                                                                                                                      |                              |
| SCCmec III     | 414        | RIF F3: 5'-GTGATTGTTGAGATATGTGG-3'<br>RIF R9: 5'-CGCTTTATCTGTATCTATCGC-3'<br>RIF F10: 5'-TTCTTAAGTACACGCTGAATCG-3'<br>RIF R13: 5'-GTCACAGTAATCCATCAATGC-3'<br>DCS F2: 5'-CATCCTATGATAGCTTGGTC-3'<br>DCS R1: 5'-CTAAATCATAGCCATGACCG-3' | Master mix: 5 µl                                                              |                                                                                                                                                                                                                                                                                              |                              |
| SCCmec V       | 325        | Type V-F: 5'-GAACATTGTTACTTAAATGAGCG-3'<br>Type V-R: 5'-TGAAAGTTGTACCCTTGACACC-3'                                                                                                                                                      | DNA: 100-300 ng<br>Primer: 100 nM V-FR<br>Master mix: 5 µl                    | Pre-denaturation: 94°C 5 min<br>Denaturation-1: 94°C 45s<br>Annealing-1: 65°C 45s<br>Extension-1: 72°C 1.5 min<br>D.A.E.-1 Cycles: 10 cycles<br>Denaturation-2: 94°C 45s<br>Annealing-2: 55°C 45s<br>Extension-2: 72°C 1.5 min<br>D.A.E.-2 Cycles: 25 cycles<br>Final extension: 72°C 10 min | [4]                          |
| SCCmec VI      | 134        | ccrB4-F: 5'-CGAAGTATAGACACTGGAGCGATA-3'<br>ccrB4-R: 5'-GCGACTCTCTTGCGCTTTA-3'                                                                                                                                                          | DNA: 100-300 ng<br>Primer: 100 nM FR,<br>Master mix: 5 µl                     | Pre-denaturation: 95°C 10 min<br>Denaturation: 95°C 30s<br>Annealing: 50°C 30s<br>Extension: 72°C 30s<br>D.A.E. Cycles: 40 cycles<br>Final extension: 72°C 5 min                                                                                                                             | [5]                          |

|                                                                                                                      |                                                      |                                                                                                                                                                                                                                                                                                                                                                                                                                                                                                                                                                                                                                                                                                                                                                           |                                                                   |                                                                                                                                                                                                                                                                                                                                                                                 |     |
|----------------------------------------------------------------------------------------------------------------------|------------------------------------------------------|---------------------------------------------------------------------------------------------------------------------------------------------------------------------------------------------------------------------------------------------------------------------------------------------------------------------------------------------------------------------------------------------------------------------------------------------------------------------------------------------------------------------------------------------------------------------------------------------------------------------------------------------------------------------------------------------------------------------------------------------------------------------------|-------------------------------------------------------------------|---------------------------------------------------------------------------------------------------------------------------------------------------------------------------------------------------------------------------------------------------------------------------------------------------------------------------------------------------------------------------------|-----|
| SCCmec<br>VII<br>SCCmec<br>VIII                                                                                      | 473<br>138                                           | Type VII F: 5'-<br>GTGACGTTGATATTGCAGTGGT-3'<br>Type VII R: 5'-TGAAGAAGTTTGTTCGCGT-3'<br>Type VIII F: 5'-<br>AGCGACGATGAACAACACCGCTACTTACTC<br>AA-3'<br>Type VIII R: 5'-<br>TTGGTTGAGAATGAGAACAGTGGTAAGATC-<br>3'                                                                                                                                                                                                                                                                                                                                                                                                                                                                                                                                                         | DNA: 100-300<br>ng<br>Primer:<br>400 nM FR<br>Master mix: 5<br>μl | Pre-denaturation: 95°C<br>2 min<br>Denaturation: 95°C 30s<br>Annealing: 54°C 1 min<br>Extension: 72°C 1 min<br>20s<br>D.A.E. Cycles: 35 cycles<br>Final extension: 72°C 7<br>min                                                                                                                                                                                                | [6] |
|                                                                                                                      |                                                      |                                                                                                                                                                                                                                                                                                                                                                                                                                                                                                                                                                                                                                                                                                                                                                           |                                                                   |                                                                                                                                                                                                                                                                                                                                                                                 |     |
| PVL                                                                                                                  | 433                                                  | PVL-1: 5'-<br>ATCATTAGGTAAAATGTCTGGACATGATCC<br>A-3'<br>PVL-2: 5'-<br>GCATCAAGTGTATTGGATAGCAAAAGC-3'                                                                                                                                                                                                                                                                                                                                                                                                                                                                                                                                                                                                                                                                      | DNA: 100-300<br>ng<br>Primer:<br>400 nM FR<br>Master mix: 5<br>μl | Pre-denaturation: 94°C<br>5 min<br>Denaturation: 94°C 40s<br>Annealing: 53°C 40s<br>Extension: 72°C 1 min<br>D.A.E. Cycles: 35 cycles<br>Final extension: 72°C<br>10 min                                                                                                                                                                                                        | [7] |
| <i>entA</i><br><i>entB</i><br><i>entC</i><br><i>entD</i><br><i>entE</i><br><i>tsst-1</i><br><i>eta</i><br><i>etb</i> | 121<br>478<br>459<br>384<br>495<br>271<br>464<br>200 | <i>entA</i> -F: 5'-TTGGAACGGTTAAAACGAA-3'<br><i>entA</i> -R: 5'-GAACCTTCCCATCAAAAACA-3'<br><i>entB</i> -F: 5'-TCGCATCAAACCTGACAAACG-3'<br><i>entB</i> -R: 5'-GCAGGTACTCTATAAGTGCC-3'<br><i>entC</i> -F: 5'-GGAGGAATAACAAAACATGAAGG-<br>3'<br><i>entC</i> -R: 5'-AAAGGCAAGCACCGAAGTAC-3'<br><i>entD</i> -F: 5'-TGGTGGTGAAATAGATAGGAC-3'<br><i>entD</i> -R: 5'-TGAAGGTGCTCTGTGGATAAT-3'<br><i>entE</i> -F: 5'-TGGTAGCGAGAAAAGCGAAG-3'<br><i>entE</i> -R: 5'-TGTAATAATGCCTTGCCTGAA-3'<br><i>tsst-1</i> -F: 5'-CTGGTATAGTAGTGGGTCTG-3'<br><i>tsst-1</i> -R: 5'-AGGTAGTTCTATTGGAGTAGG-3'<br><i>eta</i> -F: 5'-TTTGCTTTCTTGATTGGATTG-3'<br><i>eta</i> -R: 5'-GATGTGTTCCGTTTGATTGAC-3'<br><i>etb</i> -F: 5'-ACGGCTATATACATTCAATT-3'<br><i>etb</i> -R: 5'-TCCATCGATAATATACCTAA-3' | DNA: 100-300<br>ng<br>Primer: 400 nM<br>Master mix: 5<br>μl       | Pre-denaturation: 94°C<br>5 min<br>Denaturation: 94°C 1<br>min<br>Annealing: 2 min<br>Extension: 72°C 1 min<br>D.A.E. Cycles: 35 cycles<br>Final extension: 72°C 5<br>min<br>AnnealingTemp.<br><i>entA</i> : 50°C<br><i>entB</i> : 55°C<br><i>entC</i> : 59°C<br><i>entD</i> : 51°C<br><i>entE</i> : 55.5°C<br><i>tsst-1</i> : 54°C<br><i>eta</i> : 54°C<br><i>etb</i> : 50.9°C | [8] |

**Table S3.** Pearson correlation coefficient (r) value and level of significant for environmental parameters and total bacteria count.

| Correlations test    |         |             |                   |                  |                      |
|----------------------|---------|-------------|-------------------|------------------|----------------------|
|                      | Ammonia | Methylamine | Sampling Distance | Wind speed (m/s) | Total bacteria count |
| Ammonia              | 1.000   | 0.961**     | -0.092            | -0.447           | 0.865**              |
| Methylamine          | 0.961** | 1.000       | -0.089            | -0.443           | 0.940**              |
| Sampling Distance    | -0.092  | -0.089      | 1.000             | -0.490           | -0.048               |
| Wind speed (m/s)     | -0.447  | -0.443      | -0.490            | 1.000            | -0.476               |
| Total bacteria count | 0.865** | 0.940**     | -0.048            | -0.476           | 1.000                |

\*\* . Correlation is significant at the 0.01 level (2-tailed).

**Table S4.** Standard score of Zone of inhibition diameter measurement in disk diffusion method to determine the microbial resistance property.

| Antibiotic name               | Zone of inhibition diameter measurement value (mm) |              |             |
|-------------------------------|----------------------------------------------------|--------------|-------------|
|                               | Resistant                                          | Intermediate | Susceptible |
| Chloramphenicol               | ≤12                                                | 13-17        | ≥18         |
| Ciprofloxacin                 | ≤15                                                | 16-20        | ≥21         |
| Clindamycin                   | ≤14                                                | 15-20        | ≥21         |
| Erythromycin                  | ≤13                                                | 14-22        | ≥23         |
| Gentamicin                    | ≤12                                                | 13-14        | ≥15         |
| Rifampicin                    | ≤16                                                | 17-19        | ≥20         |
| Tetracycline                  | ≤14                                                | 15-18        | ≥19         |
| Sulfamethoxazole-Trimethoprim | ≤10                                                | 11-15        | ≥16         |

A reference documents CLSI M100-S27 which is modified in 2017 has been used to determine the score of Zone of inhibition diameter measurement [9]

**Table S5.** The results of Chi-square test between sampling point with MRSA strain characterization

| Chi-Square test          |                        |                     |                                   |
|--------------------------|------------------------|---------------------|-----------------------------------|
| Variables                | Degree of freedom (df) | Sampling point      |                                   |
|                          |                        | Pearson Chi-Square  | Asymptotic Significance (2-sided) |
| SCCmec typing            | 7                      | 23.000 <sup>a</sup> | 0.002                             |
| MRSA grouping            | 7                      | 23.000 <sup>a</sup> | 0.002                             |
| Spa type                 | 7                      | 23.000 <sup>a</sup> | 0.002                             |
| Virulence factors        | 21                     | 53.959 <sup>b</sup> | 0.000                             |
| Multiple drug resistance | 14                     | 26.680 <sup>c</sup> | 0.021                             |

a. 16 cells (100.0%) have expected count less than 5. The minimum expected count is .09.

b. 32 cells (100.0%) have expected count less than 5. The minimum expected count is .09.

c. 24 cells (100.0%) have expected count less than 5. The minimum expected count is .04.

## References

- Brakstad, O.G.; Aasbakk, K.; Maeland, J.A. Detection of *Staphylococcus aureus* by polymerase chain reaction amplification of the nuc gene. *Journal of Clinical Microbiology* **1992**, *30*, 1654-1660, doi:doi:10.1128/jcm.30.7.1654-1660.1992.
- Sakoulas, G.; Gold, H.S.; Venkataraman, L.; DeGirolami, P.C.; Eliopoulos, G.M.; Qian, Q. Methicillin-resistant *Staphylococcus aureus*: comparison of susceptibility testing methods and analysis of mecA-positive susceptible strains. *Journal of clinical microbiology* **2001**, *39*, 3946-3951.
- Oliveira, D.C.; Lencastre, H.d. Multiplex PCR Strategy for Rapid Identification of Structural Types and Variants of the *mecA* Element in Methicillin-Resistant *Staphylococcus aureus*. *Antimicrobial Agents and Chemotherapy* **2002**, *46*, 2155-2161, doi:doi:10.1128/AAC.46.7.2155-2161.2002.
- Zhang, K.; McClure, J.-A.; Elsayed, S.; Louie, T.; Conly, J.M. Novel Multiplex PCR Assay for Characterization and Concomitant Subtyping of Staphylococcal Cassette Chromosome *mecA* Types I to V in Methicillin-Resistant *Staphylococcus aureus*. *Journal of Clinical Microbiology* **2005**, *43*, 5026-5033, doi:doi:10.1128/JCM.43.10.5026-5033.2005.
- Chen, L.; Mediavilla José, R.; Oliveira Duarte, C.; Willey Barbara, M.; de Lencastre, H.; Kreiswirth Barry, N. Multiplex Real-Time PCR for Rapid Staphylococcal Cassette Chromosome mec Typing. *Journal of Clinical Microbiology* **2009**, *47*, 3692-3706, doi:10.1128/JCM.00766-09.
- Bhowmik, D.; Das, B.J.; Pandey, P.; Chetri, S.; Chanda, D.D.; Bhattacharjee, A. An array of multiplex PCR assays for detection of staphylococcal chromosomal cassette mec (SCCmec) types among staphylococcal isolates. *Journal of microbiological methods* **2019**, *166*, 105733.
- Asghar, A.H. Molecular characterization of methicillin-resistant *Staphylococcus aureus* isolated from tertiary care hospitals. *Pak J Med Sci* **2014**, *30*, 698-702, doi:10.12669/pjms.304.4946.
- Imani Fooladi, A.A.; Ashrafi, E.; Tazandareh, S.G.; Koosha, R.Z.; Rad, H.S.; Amin, M.; Soori, M.; Larki, R.A.; Choopani, A.; Hosseini, H.M. The distribution of pathogenic and toxigenic genes among MRSA and MSSA clinical isolates. *Microbial Pathogenesis* **2015**, *81*, 60-66, doi:https://doi.org/10.1016/j.micpath.2015.03.013.
- Clinical; Institute, L.S. Performance standards for antimicrobial susceptibility testing. **2017**.
